# Supplementary material for: Analysis of the Characteristics of Psychiatric Immune - related Adverse Events Induced by Immune Checkpoint Inhibitors in Immunotherapy from 2004 to 2025
Source: Research Square preprint supplement (doi:10.21203/rs.3.rs-7892680/v1), 2025-12-01
Supplement: Supplementary file 1 [file 422f9fbf268d2c3d56f7fe2f.docx]

Table S4 ROR Signals of Each Drug (Per Drug PT, stratified by Report Continent)

| **Drug** | **Report State** | **PT** | **ROR Value** | **ROR Signal** | **P** | **P adj.** |
| --- | --- | --- | --- | --- | --- | --- |
| Atezolizumab | ALL | Delirium | 1.846383719 | Y | <.0001 | <.0001 |
|  | North America | Confusional state | 1.966991888 | Y | <.0001 | <.0001 |
|  | North America | Mental status changes | 3.141924184 | Y | <.0001 | <.0001 |
|  | North America | Delirium | 2.588593842 | Y | 0.0024 | 0.1816 |
|  | North America | Anxiety disorder | 6.703083022 | Y | 0.0033 | 0.2301 |
| Avelumab | North America | Confusional state | 2.158903597 | Y | 0.0712 | 1.0000 |
| Cemiplimab | ALL | Delirium | 2.702087208 | Y | 0.0047 | 0.3994 |
|  | Europe | Delirium | 2.63595785 | Y | 0.0592 | 1.0000 |
| Durvalumab | ALL | Delirium | 1.627196646 | Y | 0.0140 | 0.3464 |
|  | North America | Confusional state | 1.594314497 | Y | 0.0129 | 1.0000 |
|  | North America | Delirium | 3.560756754 | Y | 0.0002 | 0.0379 |
| Ipilimumab | ALL | Delirium | 1.759699972 | Y | 0.0001 | 0.0051 |
|  | North America | Confusional state | 1.343248997 | Y | 0.0232 | 1.0000 |
|  | North America | Delirium | 1.898160734 | Y | 0.0240 | 1.0000 |
|  | South America | Disorientation | 7.238604285 | Y | 0.0026 | 0.2247 |
|  | South America | Confusional state | 3.07206689 | Y | 0.0550 | 1.0000 |
| Nivolumab | ALL | Delirium | 1.565267628 | Y | <.0001 | <.0001 |
|  | ALL | Organic brain syndrome | 5.6675622 | Y | 0.0172 | 0.1695 |
|  | North America | Confusional state | 1.314375339 | Y | <.0001 | 0.0021 |
|  | North America | Mental status changes | 2.029425366 | Y | <.0001 | <.0001 |
|  | North America | Delirium | 1.58853277 | Y | 0.0032 | 0.1224 |
|  | South America | Confusional state | 2.024652716 | Y | 0.0411 | 0.8959 |
|  | South America | Disorientation | 2.856849746 | Y | 0.0196 | 0.5065 |
|  | South America | Psychiatric symptom | 7.396024298 | Y | 0.0007 | 0.0330 |
|  | South America | Discouragement | 2.687549059 | Y | 0.0541 | 1.0000 |
|  | South America | Delirium | 3.245266681 | Y | 0.0177 | 0.4710 |
|  | Europe | Organic brain syndrome | 3.793188214 | Y | 0.0474 | 0.9933 |
| Pembrolizumab | ALL | Delirium | 1.715175854 | Y | <.0001 | <.0001 |
|  | ALL | Eating disorder | 1.472040919 | Y | 0.0005 | 0.0077 |
|  | ALL | Organic brain syndrome | 8.55599279 | Y | 0.0014 | 0.0196 |
|  | ALL | Fear of eating | 4.06406347 | Y | 0.0395 | 0.3207 |
|  | North America | Confusional state | 1.203414402 | Y | 0.0147 | 0.3733 |
|  | North America | Eating disorder | 2.682805599 | Y | <.0001 | <.0001 |
|  | North America | Mental status changes | 1.477774194 | Y | 0.0043 | 0.1458 |
|  | North America | Poor quality sleep | 2.109171107 | Y | <.0001 | <.0001 |
|  | North America | Near death experience | 2.368927168 | Y | 0.0252 | 0.5591 |
|  | North America | Fear of eating | 9.621960212 | Y | 0.0041 | 0.1410 |
|  | South America | Delirium | 2.712176183 | Y | 0.0969 | 1.0000 |
|  | Europe | Organic brain syndrome | 7.986492878 | Y | 0.0019 | 0.0752 |
| Tislelizumab | ALL | Poor quality sleep | 2.902236666 | Y | 0.0170 | 1.0000 |
|  | ALL | Dysphoria | 11.81788899 | Y | <.0001 | 0.0037 |
|  | ALL | Listless | 15.45813777 | Y | <.0001 | 0.0051 |
|  | Asia | Poor quality sleep | 5.988749897 | Y | <.0001 | 0.0045 |
|  | Asia | Dysphoria | 3.092736665 | Y | 0.0109 | 1.0000 |
|  | Asia | Listless | 7.155539882 | Y | 0.0008 | 0.2540 |
