# Supplementary material for: Analysis of the Characteristics of Psychiatric Immune - related Adverse Events Induced by Immune Checkpoint Inhibitors in Immunotherapy from 2004 to 2025
Source: Research Square preprint supplement (doi:10.21203/rs.3.rs-7892680/v1), 2025-12-01
Supplement: Supplementary file 2 [file 44453e57c7bc3f4e4688b2c3.docx]

Table S5 ROR Signals of Each Drug (Per Drug PT, stratified by Onset Time)

| **Drug** | **Time** | **PT** | **ROR Value** | **ROR Signal** | **P** | **P adj.** |
| --- | --- | --- | --- | --- | --- | --- |
| **Atezolizumab** | ALL | Delirium | 1.846383719 | Y | <.0001 | <.0001 |
|  | 0-30d | Delirium | 1.764663742 | Y | 0.0085 | 0.4235 |
|  | 31-60d | Mental status changes | 2.268227147 | Y | 0.0809 | 1.0000 |
|  | 31-60d | Delirium | 2.786419489 | Y | 0.0234 | 0.8766 |
|  | >360d | Mental status changes | 4.383037308 | Y | 0.0325 | 1.0000 |
| **Avelumab** | 0-30d | Delirium | 3.307014617 | Y | 0.0643 | 1.0000 |
| **Cemiplimab** | ALL | Delirium | 2.702087208 | Y | 0.0047 | 0.3994 |
| **Durvalumab** | ALL | Delirium | 1.627196646 | Y | 0.0140 | 0.3464 |
|  | 61-90d | Delirium | 7.016769914 | Y | 0.0097 | 0.8375 |
|  | 181-360d | Delirium | 10.71343181 | Y | 0.0030 | 0.3477 |
| **Ipilimumab** | ALL | Delirium | 1.759699972 | Y | 0.0001 | 0.0051 |
| **Nivolumab** | ALL | Delirium | 1.565267628 | Y | <.0001 | <.0001 |
|  | ALL | Organic brain syndrome | 5.6675622 | Y | 0.0172 | 0.1695 |
|  | 0-30d | Delirium | 1.973911481 | Y | <.0001 | <.0001 |
|  | 0-30d | Anxiety disorder | 2.579166682 | Y | 0.0677 | 1.0000 |
|  | 0-30d | Substance-induced psychotic disorder | 3.911389563 | Y | 0.0438 | 0.8310 |
|  | 31-60d | Delirium | 1.872394068 | Y | 0.0184 | 0.4412 |
|  | 91-120d | Mental status changes | 3.253458232 | Y | 0.0007 | 0.0317 |
|  | 181-360d | Mental status changes | 2.10134348 | Y | 0.0604 | 1.0000 |
|  | >360d | Delirium | 3.361291754 | Y | 0.0138 | 0.3569 |
| **Pembrolizumab** | ALL | Delirium | 1.715175854 | Y | <.0001 | <.0001 |
|  | ALL | Eating disorder | 1.472040919 | Y | 0.0005 | 0.0077 |
|  | ALL | Organic brain syndrome | 8.55599279 | Y | 0.0014 | 0.0196 |
|  | ALL | Fear of eating | 4.06406347 | Y | 0.0395 | 0.3207 |
|  | 0-30d | Delirium | 1.977624809 | Y | <.0001 | 0.0007 |
|  | 121-150d | Mental status changes | 5.168247639 | Y | 0.0034 | 0.1294 |
|  | 181-360d | Mental status changes | 3.085382465 | Y | 0.0113 | 0.3234 |
|  | 181-360d | Delirium | 3.463027263 | Y | 0.0115 | 0.3287 |
|  | 181-360d | Eating disorder | 3.893138793 | Y | 0.0155 | 0.4095 |
| **Tislelizumab** | ALL | Poor quality sleep | 2.902236666 | Y | 0.0170 | 1.0000 |
|  | ALL | Dysphoria | 11.81788899 | Y | <.0001 | 0.0037 |
|  | ALL | Listless | 15.45813777 | Y | <.0001 | 0.0051 |
|  | 0-30d | Listless | 10.81280161 | Y | 0.0029 | 1.0000 |
