# Supplementary material for: Analysis of the Characteristics of Psychiatric Immune - related Adverse Events Induced by Immune Checkpoint Inhibitors in Immunotherapy from 2004 to 2025
Source: Research Square preprint supplement (doi:10.21203/rs.3.rs-7892680/v1), 2025-12-01
Supplement: Supplementary file 3 [file 62c96883ae3b589b1833c280.docx]

Table S3 ROR Signals of Each Drug (Per Drug PT, stratified by Age)

| **Drug** | **Age** | **PT** | **ROR Value** | **ROR Signal** | **P** | **P adj.** |
| --- | --- | --- | --- | --- | --- | --- |
| **Atezolizumab** | ALL | Delirium | 1.846383719 | Y | <.0001 | <.0001 |
|  | NS | Delirium | 2.184744512 | Y | 0.0056 | 0.2498 |
|  | NS | Anxiety disorder | 4.638379973 | Y | 0.0118 | 0.4567 |
| **Cemiplimab** | ALL | Delirium | 2.702087208 | Y | 0.0047 | 0.3994 |
|  | NS | Delirium | 4.105332835 | Y | 0.0008 | 0.3164 |
| **Durvalumab** | ALL | Delirium | 1.627196646 | Y | 0.0140 | 0.3464 |
|  | NS | Delirium | 2.345149386 | Y | 0.0421 | 1.0000 |
| **Ipilimumab** | ≥65 | Delirium | 1.550841857 | Y | 0.0156 | 0.7031 |
|  | ≥65 | Depressive symptom | 7.551701252 | Y | 0.0006 | 0.0505 |
|  | ≥65 | Substance-induced psychotic disorder | 7.126426129 | Y | 0.0093 | 0.4729 |
|  | ALL | Delirium | 1.759699972 | Y | 0.0001 | 0.0051 |
| **Nivolumab** | ≥65 | Delirium | 1.326932253 | Y | 0.0043 | 0.1206 |
|  | ALL | Delirium | 1.565267628 | Y | <.0001 | <.0001 |
|  | ALL | Organic brain syndrome | 5.6675622 | Y | 0.0172 | 0.1695 |
|  | NS | Mental status changes | 1.634988746 | Y | 0.0409 | 0.7070 |
| **Pembrolizumab** | ≥65 | Delirium | 1.533477651 | Y | <.0001 | 0.0005 |
|  | ≥65 | Depressive symptom | 2.502606006 | Y | 0.0468 | 0.7239 |
|  | ≥65 | Somatic symptom disorder | 3.171334371 | Y | 0.0721 | 0.9798 |
|  | ALL | Delirium | 1.715175854 | Y | <.0001 | <.0001 |
|  | ALL | Eating disorder | 1.472040919 | Y | 0.0005 | 0.0077 |
|  | ALL | Organic brain syndrome | 8.55599279 | Y | 0.0014 | 0.0196 |
|  | ALL | Fear of eating | 4.06406347 | Y | 0.0395 | 0.3207 |
|  | NS | Eating disorder | 1.997587561 | Y | 0.0002 | 0.0079 |
|  | NS | Poor quality sleep | 1.873503599 | Y | 0.0012 | 0.0385 |
| **Tislelizumab** | ≥65 | Dysphoria | 58.74533535 | Y | <.0001 | 0.0155 |
|  | ALL | Poor quality sleep | 2.902236666 | Y | 0.0170 | 1.0000 |
|  | ALL | Dysphoria | 11.81788899 | Y | <.0001 | 0.0037 |
|  | ALL | Listless | 15.45813777 | Y | <.0001 | 0.0051 |
|  | NS | Listless | 30.76393158 | Y | <.0001 | 0.0008 |
|  | NS | Poor quality sleep | 2.803581347 | Y | 0.0829 | 1.0000 |
