# Supplementary material for: Analysis of the Characteristics of Psychiatric Immune - related Adverse Events Induced by Immune Checkpoint Inhibitors in Immunotherapy from 2004 to 2025
Source: Research Square preprint supplement (doi:10.21203/rs.3.rs-7892680/v1), 2025-12-01
Supplement: Supplementary file 4 [file 6bb20e15eb2d5a59971901ac.docx]

Table S2 ROR Signals of Each Drug (Per Drug PT, stratified by Sex)

| **Drug** | **Gender** | **PT** | **ROR Value** | **ROR Signal** | **P** | **P adj.** |
| --- | --- | --- | --- | --- | --- | --- |
| **Atezolizumab** | ALL | Delirium | 1.846383719 | Y | <.0001 | <.0001 |
|  | Female | Anxiety disorder | 3.738098504 | Y | 0.0190 | 0.4649 |
|  | Male | Delirium | 1.659688638 | Y | 0.0022 | 0.0793 |
| **Cemiplimab** | ALL | Delirium | 2.702087208 | Y | 0.0047 | 0.3994 |
|  | Not Specified | Delirium | 3.368317517 | Y | 0.0135 | 1.0000 |
| **Durvalumab** | ALL | Delirium | 1.627196646 | Y | 0.0140 | 0.3464 |
|  | Female | Delirium | 2.730924469 | Y | 0.0076 | 0.3741 |
| **Ipilimumab** | ALL | Delirium | 1.759699972 | Y | 0.0001 | 0.0051 |
|  | Female | Delirium | 2.36666523 | Y | 0.0009 | 0.0494 |
| **Nivolumab** | ALL | Delirium | 1.565267628 | Y | <.0001 | <.0001 |
|  | ALL | Organic brain syndrome | 5.6675622 | Y | 0.0172 | 0.1695 |
|  | Female | Delirium | 1.60853357 | Y | 0.0028 | 0.0618 |
|  | Female | Mental status changes | 1.746392845 | Y | 0.0005 | 0.0138 |
|  | Male | Delirium | 1.301199243 | Y | 0.0079 | 0.1486 |
|  | Male | Organic brain syndrome | 7.480904945 | Y | 0.0085 | 0.1581 |
| **Pembrolizumab** | ALL | Delirium | 1.715175854 | Y | <.0001 | <.0001 |
|  | ALL | Eating disorder | 1.472040919 | Y | 0.0005 | 0.0077 |
|  | ALL | Organic brain syndrome | 8.55599279 | Y | 0.0014 | 0.0196 |
|  | ALL | Fear of eating | 4.06406347 | Y | 0.0395 | 0.3207 |
|  | Female | Delirium | 1.628822777 | Y | 0.0004 | 0.0124 |
|  | Female | Eating disorder | 1.559874683 | Y | 0.0027 | 0.0607 |
|  | Female | Substance-induced psychotic disorder | 2.51106104 | Y | 0.0764 | 0.8438 |
|  | Male | Delirium | 1.584491672 | Y | <.0001 | 0.0005 |
|  | Male | Eating disorder | 1.41381614 | Y | 0.0430 | 0.5615 |
| **Tislelizumab** | ALL | Poor quality sleep | 2.902236666 | Y | 0.0170 | 1.0000 |
|  | ALL | Dysphoria | 11.81788899 | Y | <.0001 | 0.0037 |
|  | ALL | Listless | 15.45813777 | Y | <.0001 | 0.0051 |
|  | Not Specified | Poor quality sleep | 3.600265907 | Y | 0.0031 | 0.8603 |
|  | Not Specified | Dysphoria | 7.247462964 | Y | 0.0002 | 0.0949 |
|  | Not Specified | Listless | 26.74986887 | Y | <.0001 | 0.0012 |
