# Supplementary material for: Analysis of the Characteristics of Psychiatric Immune - related Adverse Events Induced by Immune Checkpoint Inhibitors in Immunotherapy from 2004 to 2025
Source: Research Square preprint supplement (doi:10.21203/rs.3.rs-7892680/v1), 2025-12-01
Supplement: Supplementary file 5 [file 7b07f27ba6f29a962591d28e.docx]

Table S7 ROR Signals of Each Drug (Per Drug PT, stratified by Serious Report)

| **Drug** | **Serious/Non-Serious** | **PT** | **ROR Value** | **ROR Signal** | **P** | **P adj.** |
| --- | --- | --- | --- | --- | --- | --- |
| **Atezolizumab** | ALL | Delirium | 1.846383719 | Y | <.0001 | <.0001 |
|  | Serious | Delirium | 1.334854866 | Y | 0.0262 | 0.5631 |
| **Cemiplimab** | ALL | Delirium | 2.702087208 | Y | 0.0047 | 0.3994 |
|  | Serious | Delirium | 2.060376694 | Y | 0.0483 | 1.0000 |
| **Durvalumab** | ALL | Delirium | 1.627196646 | Y | 0.0140 | 0.3464 |
| **Ipilimumab** | ALL | Delirium | 1.759699972 | Y | 0.0001 | 0.0051 |
|  | Non-Serious | Eating disorder | 2.997672816 | Y | 0.0611 | 1.0000 |
|  | Serious | Delirium | 1.348903954 | Y | 0.0466 | 1.0000 |
| **Nivolumab** | ALL | Delirium | 1.565267628 | Y | <.0001 | <.0001 |
|  | ALL | Organic brain syndrome | 5.6675622 | Y | 0.0172 | 0.1695 |
|  | Non-Serious | Eating disorder | 2.627826109 | Y | 0.0012 | 0.0252 |
|  | Serious | Delirium | 1.18465067 | Y | 0.0377 | 0.4591 |
|  | Serious | Organic brain syndrome | 4.277295422 | Y | 0.0351 | 0.4351 |
| **Pembrolizumab** | ALL | Delirium | 1.715175854 | Y | <.0001 | <.0001 |
|  | ALL | Eating disorder | 1.472040919 | Y | 0.0005 | 0.0077 |
|  | ALL | Organic brain syndrome | 8.55599279 | Y | 0.0014 | 0.0196 |
|  | ALL | Fear of eating | 4.06406347 | Y | 0.0395 | 0.3207 |
|  | Non-Serious | Poor quality sleep | 1.902713489 | Y | 0.0035 | 0.0599 |
|  | Non-Serious | Eating disorder | 2.020217568 | Y | 0.0098 | 0.1432 |
|  | Non-Serious | Sleep disorder due to general medical condition, insomnia type | 3.577953444 | Y | 0.0088 | 0.1314 |
|  | Serious | Delirium | 1.373695104 | Y | 0.0001 | 0.0030 |
|  | Serious | Eating disorder | 1.345790897 | Y | 0.0150 | 0.2001 |
|  | Serious | Organic brain syndrome | 6.833469801 | Y | 0.0032 | 0.0566 |
|  | Serious | Fear of eating | 4.97694046 | Y | 0.0240 | 0.2905 |
| **Tislelizumab** | ALL | Poor quality sleep | 2.902236666 | Y | 0.0170 | 1.0000 |
|  | ALL | Dysphoria | 11.81788899 | Y | <.0001 | 0.0037 |
|  | ALL | Listless | 15.45813777 | Y | <.0001 | 0.0051 |
|  | Serious | Poor quality sleep | 3.694014961 | Y | 0.0024 | 0.4841 |
|  | Serious | Dysphoria | 10.01301981 | Y | <.0001 | 0.0151 |
|  | Serious | Listless | 13.29940844 | Y | <.0001 | 0.0171 |
