# Supplementary material for: Analysis of the Characteristics of Psychiatric Immune - related Adverse Events Induced by Immune Checkpoint Inhibitors in Immunotherapy from 2004 to 2025
Source: Research Square preprint supplement (doi:10.21203/rs.3.rs-7892680/v1), 2025-12-01
Supplement: Supplementary file 6 [file 92dbbacef8dfa20620849711.docx]

Table S6 ROR Signals of Each Drug (Per Drug PT, stratified by Report Country)

| **Drug** | **Report Country** | **PT** | **ROR Value** | **ROR Signal** | **P** | **P adj.** |
| --- | --- | --- | --- | --- | --- | --- |
| **Atezolizumab** | ALL | Delirium | 1.846383719 | Y | <.0001 | <.0001 |
|  | Russia | Confusional state | 3.234409722 | Y | 0.0717 | 1.0000 |
|  | Finland | Confusional state | 6.384594004 | Y | 0.0042 | 0.7317 |
|  | Canada | Anxiety | 3.827690167 | Y | <.0001 | 0.0017 |
|  | Canada | Depression | 3.818083066 | Y | <.0001 | 0.0295 |
|  | Canada | Anxiety disorder | 123.5248195 | Y | <.0001 | <.0001 |
|  | Canada | Nervousness | 6.563335716 | Y | 0.0114 | 1.0000 |
|  | United States of America | Confusional state | 2.19012964 | Y | <.0001 | <.0001 |
|  | United States of America | Mental status changes | 3.146601949 | Y | <.0001 | <.0001 |
|  | United States of America | Delirium | 2.456452169 | Y | 0.0188 | 1.0000 |
|  | Sweden | Confusional state | 5.535520145 | Y | 0.0069 | 1.0000 |
|  | Israel | Confusional state | 4.612990439 | Y | 0.0124 | 1.0000 |
|  | India | Eating disorder | 3.217324692 | Y | 0.0504 | 1.0000 |
| **Avelumab** | Canada | Anxiety | 6.824520177 | Y | <.0001 | <.0001 |
|  | Canada | Depression | 5.640217958 | Y | 0.0023 | 1.0000 |
| **Cemiplimab** | ALL | Delirium | 2.702087208 | Y | 0.0047 | 0.3994 |
| **Durvalumab** | ALL | Delirium | 1.627196646 | Y | 0.0140 | 0.3464 |
|  | Canada | Confusional state | 2.349539837 | Y | 0.0174 | 1.0000 |
|  | Canada | Delirium | 5.990599851 | Y | <.0001 | 0.0011 |
|  | India | Anxiety | 3.400362158 | Y | 0.0610 | 1.0000 |
| **Ipilimumab** | ALL | Delirium | 1.759699972 | Y | 0.0001 | 0.0051 |
|  | Belgium | Sleep disorder | 10.69612591 | Y | 0.0032 | 0.6978 |
|  | Germany | Personality change | 3.968717737 | Y | 0.0417 | 1.0000 |
|  | Canada | Delirium | 6.558348072 | Y | 0.0115 | 1.0000 |
|  | United States of America | Confusional state | 1.352511224 | Y | 0.0224 | 1.0000 |
|  | India | Mental status changes | 25.86005141 | Y | <.0001 | 0.0014 |
|  | India | Confusional state | 5.317715744 | Y | 0.0203 | 1.0000 |
| **Nivolumab** | ALL | Delirium | 1.565267628 | Y | <.0001 | <.0001 |
|  | ALL | Organic brain syndrome | 5.6675622 | Y | 0.0172 | 0.1695 |
|  | Brazil | Confusional state | 2.909905739 | Y | 0.0087 | 0.6542 |
|  | Belgium | Sleep disorder | 3.008913936 | Y | 0.0317 | 1.0000 |
|  | Belgium | Poor quality sleep | 4.813907344 | Y | 0.0116 | 0.7984 |
|  | Belgium | Eating disorder | 5.981251167 | Y | 0.0165 | 0.9941 |
|  | Colombia | Disorientation | 4.682330457 | Y | 0.0002 | 0.0373 |
|  | Colombia | Psychiatric symptom | 8.742658291 | Y | 0.0004 | 0.0529 |
|  | Colombia | Delirium | 3.963255782 | Y | 0.0427 | 1.0000 |
|  | Netherlands | Delirium | 2.637380851 | Y | 0.0338 | 1.0000 |
|  | Canada | Anxiety | 3.648672702 | Y | <.0001 | <.0001 |
|  | Canada | Depression | 4.666991177 | Y | <.0001 | <.0001 |
|  | Canada | Insomnia | 2.018658594 | Y | <.0001 | <.0001 |
|  | Canada | Sleep disorder | 1.69797725 | Y | 0.0065 | 0.5328 |
|  | Canada | Irritability | 6.007940176 | Y | <.0001 | <.0001 |
|  | Canada | Emotional disorder | 3.996762549 | Y | <.0001 | 0.0066 |
|  | Canada | Euphoric mood | 6.264601629 | Y | <.0001 | <.0001 |
|  | Canada | Mood altered | 2.872444769 | Y | 0.0095 | 0.6932 |
|  | Canada | Libido decreased | 6.099975112 | Y | 0.0016 | 0.1925 |
|  | Canada | Behaviour disorder | 6.204201655 | Y | 0.0135 | 0.8756 |
|  | Croatia | Insomnia | 3.712071828 | Y | 0.0504 | 1.0000 |
|  | United States of America | Confusional state | 1.313021207 | Y | 0.0001 | 0.0197 |
|  | United States of America | Mental status changes | 2.050450132 | Y | <.0001 | <.0001 |
|  | United States of America | Eating disorder | 1.438058658 | Y | 0.0362 | 1.0000 |
|  | United States of America | Delirium | 1.658816067 | Y | 0.0045 | 0.4143 |
|  | Slovenia | Confusional state | 8.310657596 | Y | 0.0017 | 0.2041 |
| **Pembrolizumab** | ALL | Delirium | 1.715175854 | Y | <.0001 | <.0001 |
|  | ALL | Eating disorder | 1.472040919 | Y | 0.0005 | 0.0077 |
|  | ALL | Organic brain syndrome | 8.55599279 | Y | 0.0014 | 0.0196 |
|  | ALL | Fear of eating | 4.06406347 | Y | 0.0395 | 0.3207 |
|  | Brazil | Delirium | 4.261924342 | Y | 0.0351 | 1.0000 |
|  | Germany | Organic brain syndrome | 10.34071137 | Y | 0.0035 | 0.3496 |
|  | Colombia | Mental disorder | 9.054319728 | Y | 0.0050 | 0.4452 |
|  | Canada | Anxiety | 1.879192787 | Y | 0.0034 | 0.3478 |
|  | Canada | Depressed mood | 3.083958407 | Y | 0.0110 | 0.7435 |
|  | Canada | Fear | 7.830262802 | Y | 0.0005 | 0.0782 |
|  | Canada | Frustration tolerance decreased | 5.902901167 | Y | 0.0052 | 0.4591 |
|  | Canada | Anger | 4.554987494 | Y | 0.0125 | 0.8007 |
|  | Canada | Emotional disorder | 3.816078431 | Y | 0.0457 | 1.0000 |
|  | Czech Republic | Insomnia | 3.218139693 | Y | 0.0701 | 1.0000 |
|  | United States of America | Confusional state | 1.233554838 | Y | 0.0067 | 0.5477 |
|  | United States of America | Eating disorder | 2.902161361 | Y | <.0001 | <.0001 |
|  | United States of America | Mental status changes | 1.419926358 | Y | 0.0104 | 0.7144 |
|  | United States of America | Poor quality sleep | 2.209490626 | Y | <.0001 | <.0001 |
|  | United States of America | Delirium | 1.625838801 | Y | 0.0109 | 0.7363 |
|  | United States of America | Near death experience | 2.439511444 | Y | 0.0201 | 1.0000 |
|  | United States of America | Sleep disorder due to general medical condition, insomnia type | 2.283085012 | Y | 0.0504 | 1.0000 |
|  | United States of America | Fear of eating | 10.26242313 | Y | 0.0034 | 0.3491 |
|  | Mexico | Depressed mood | 3.846739174 | Y | 0.0457 | 1.0000 |
|  | Slovenia | Confusional state | 4.167239404 | Y | 0.0036 | 0.3547 |
| **Tislelizumab** | ALL | Poor quality sleep | 2.902236666 | Y | 0.0170 | 1.0000 |
|  | ALL | Dysphoria | 11.81788899 | Y | <.0001 | 0.0037 |
|  | ALL | Listless | 15.45813777 | Y | <.0001 | 0.0051 |
|  | China | Listless | 3.463062459 | Y | 0.0124 | 1.0000 |
