# Supplementary material for: Analysis of the Characteristics of Psychiatric Immune - related Adverse Events Induced by Immune Checkpoint Inhibitors in Immunotherapy from 2004 to 2025
Source: Research Square preprint supplement (doi:10.21203/rs.3.rs-7892680/v1), 2025-12-01
Supplement: Supplementary file 7 [file b26ad78d4882d2fba3d79f31.docx]

Table S8 ROR Signals of Each Drug (Per Drug PT, stratified by Reporter)

| **Drug** | **Reporter** | **PT** | **ROR Value** | **ROR Signal** | **P** | **P adj.** |
| --- | --- | --- | --- | --- | --- | --- |
| **Atezolizumab** | ALL | Delirium | 1.846383719 | Y | <.0001 | <.0001 |
|  | Consumer | Anxiety disorder | 7.293488038 | Y | 0.0086 | 0.3393 |
| **Avelumab** | Not Specified | Confusional state | 8.394817019 | Y | 0.0061 | 1.0000 |
| **Cemiplimab** | ALL | Delirium | 2.702087208 | Y | 0.0047 | 0.3994 |
|  | Consumer | Sleep disorder | 2.532311502 | Y | 0.0728 | 1.0000 |
|  | Consumer | Eating disorder | 4.245013322 | Y | 0.0351 | 1.0000 |
|  | Healthcare Professional | Delirium | 2.060011057 | Y | 0.0668 | 1.0000 |
| **Durvalumab** | ALL | Delirium | 1.627196646 | Y | 0.0140 | 0.3464 |
|  | Not Specified | Delirium | 2.434183946 | Y | 0.0887 | 1.0000 |
| **Ipilimumab** | ALL | Delirium | 1.759699972 | Y | 0.0001 | 0.0051 |
|  | Consumer | Mental status changes | 6.659670664 | Y | <.0001 | <.0001 |
|  | Consumer | Delirium | 2.907449446 | Y | 0.0042 | 0.2078 |
| **Nivolumab** | ALL | Delirium | 1.565267628 | Y | <.0001 | <.0001 |
|  | ALL | Organic brain syndrome | 5.6675622 | Y | 0.0172 | 0.1695 |
|  | Consumer | Delirium | 1.847870294 | Y | 0.0054 | 0.1240 |
|  | Healthcare Professional | Organic brain syndrome | 4.86273091 | Y | 0.0256 | 0.4375 |
| **Pembrolizumab** | ALL | Delirium | 1.715175854 | Y | <.0001 | <.0001 |
|  | ALL | Eating disorder | 1.472040919 | Y | 0.0005 | 0.0077 |
|  | ALL | Organic brain syndrome | 8.55599279 | Y | 0.0014 | 0.0196 |
|  | ALL | Fear of eating | 4.06406347 | Y | 0.0395 | 0.3207 |
|  | Consumer | Eating disorder | 2.204921109 | Y | <.0001 | <.0001 |
|  | Consumer | Delirium | 4.185191161 | Y | <.0001 | <.0001 |
|  | Consumer | Poor quality sleep | 1.532438431 | Y | 0.0090 | 0.1693 |
|  | Consumer | Mental status changes | 2.833498564 | Y | <.0001 | <.0001 |
|  | Consumer | Sleep disorder due to general medical condition, insomnia type | 2.406339638 | Y | 0.0358 | 0.4970 |
|  | Consumer | Substance-induced psychotic disorder | 6.828824417 | Y | 0.0010 | 0.0258 |
|  | Healthcare Professional | Organic brain syndrome | 8.174874328 | Y | 0.0017 | 0.0425 |
|  | Not Specified | Confusional state | 3.544861153 | Y | <.0001 | 0.0005 |
|  | Not Specified | Mental status changes | 7.326835904 | Y | 0.0007 | 0.0195 |
| **Tislelizumab** | ALL | Poor quality sleep | 2.902236666 | Y | 0.0170 | 1.0000 |
|  | ALL | Dysphoria | 11.81788899 | Y | <.0001 | 0.0037 |
|  | ALL | Listless | 15.45813777 | Y | <.0001 | 0.0051 |
|  | Healthcare Professional | Listless | 25.7351914 | Y | <.0001 | 0.0013 |
|  | Healthcare Professional | Poor quality sleep | 4.208009775 | Y | 0.0161 | 1.0000 |
|  | Not Specified | Dysphoria | 52.65090803 | Y | <.0001 | 0.0009 |
