# Supplementary material for: Analysis of the Characteristics of Psychiatric Immune - related Adverse Events Induced by Immune Checkpoint Inhibitors in Immunotherapy from 2004 to 2025
Source: Research Square preprint supplement (doi:10.21203/rs.3.rs-7892680/v1), 2025-12-01
Supplement: Supplementary file 9 [file dea0f6a7916bc66ca115f932.docx]

Table S1 ROR Signals of Each Drug (Per Drug PT)

| **Drug** | **PT** | **ROR Value** | **ROR Signal** | **P** | **P adj.** |
| --- | --- | --- | --- | --- | --- |
| **Atezolizumab** | Delirium | 1.846383719 | Y | <.0001 | <.0001 |
| **Cemiplimab** | Delirium | 2.702087208 | Y | 0.0047 | 0.3994 |
| **Durvalumab** | Delirium | 1.627196646 | Y | 0.0140 | 0.3464 |
| **Ipilimumab** | Delirium | 1.759699972 | Y | 0.0001 | 0.0051 |
| **Nivolumab** | Delirium | 1.565267628 | Y | <.0001 | <.0001 |
|  | Organic brain syndrome | 5.6675622 | Y | 0.0172 | 0.1695 |
| **Pembrolizumab** | Delirium | 1.715175854 | Y | <.0001 | <.0001 |
|  | Eating disorder | 1.472040919 | Y | 0.0005 | 0.0077 |
|  | Organic brain syndrome | 8.55599279 | Y | 0.0014 | 0.0196 |
|  | Fear of eating | 4.06406347 | Y | 0.0170 | 1.0000 |
| **Tislelizumab** | Poor quality sleep | 2.902236666 | Y | <.0001 | 0.0037 |
|  | Dysphoria | 11.81788899 | Y | <.0001 | 0.0051 |
|  | Listless | 15.45813777 | Y | <.0001 | <.0001 |
