# Supplementary material for: Analysis of the Characteristics of Psychiatric Immune - related Adverse Events Induced by Immune Checkpoint Inhibitors in Immunotherapy from 2004 to 2025
Source: Research Square preprint supplement (doi:10.21203/rs.3.rs-7892680/v1), 2025-12-01
Supplement: Supplementary file 11 [file fff856236676e77686e8f385.docx]

Table S9 ROR Signals of Each Drug (Per Drug PT, stratified by Report Year)

| **Drug** | **Report Year** | **PT** | **ROR Value** | **ROR Signal** | **P** | **P adj.** |
| --- | --- | --- | --- | --- | --- | --- |
| **Atezolizumab** | 2017 | Delirium | 4.914723398 | Y | 0.0097 | 0.4540 |
|  | 2017 | Mental status changes | 4.39828309 | Y | 0.0322 | 1.0000 |
|  | 2018 | Confusional state | 2.235176444 | Y | 0.0010 | 0.0746 |
|  | 2018 | Delirium | 3.34342441 | Y | 0.0142 | 0.6002 |
|  | 2018 | Mental status changes | 3.848608937 | Y | 0.0160 | 0.6487 |
|  | 2019 | Delirium | 3.781299192 | Y | <.0001 | 0.0080 |
|  | 2020 | Mental status changes | 3.147080436 | Y | 0.0095 | 0.4448 |
|  | 2022 | Delirium | 2.607210692 | Y | 0.0014 | 0.0971 |
|  | ALL | Delirium | 1.846383719 | Y | <.0001 | <.0001 |
| **Avelumab** | 2022 | Confusional state | 2.835915048 | Y | 0.0400 | 1.0000 |
| **Cemiplimab** | 2022 | Confusional state | 3.034990404 | Y | 0.0125 | 1.0000 |
|  | 2022 | Delirium | 8.870494519 | Y | 0.0012 | 0.5343 |
|  | ALL | Delirium | 2.702087208 | Y | 0.0047 | 0.3994 |
| **Durvalumab** | 2020 | Delirium | 2.994073905 | Y | 0.0137 | 1.0000 |
|  | ALL | Delirium | 1.627196646 | Y | 0.0140 | 0.3464 |
| **Ipilimumab** | 2011 | Confusional state | 2.313425949 | Y | 0.0305 | 1.0000 |
|  | 2012 | Mental status changes | 2.929353077 | Y | 0.0331 | 1.0000 |
|  | 2013 | Delirium | 2.976463265 | Y | 0.0636 | 1.0000 |
|  | 2014 | Confusional state | 1.837898633 | Y | 0.0138 | 1.0000 |
|  | 2022 | Delirium | 4.115767627 | Y | <.0001 | 0.0150 |
|  | ALL | Delirium | 1.759699972 | Y | 0.0001 | 0.0051 |
| **Nivolumab** | 2015 | Confusional state | 1.989658346 | Y | 0.0014 | 0.0632 |
|  | 2017 | Delirium | 2.320994279 | Y | <.0001 | 0.0052 |
|  | 2018 | Mental status changes | 2.726025145 | Y | <.0001 | 0.0001 |
|  | 2018 | Delirium | 1.799173938 | Y | 0.0066 | 0.2318 |
|  | 2018 | Substance-induced psychotic disorder | 3.311826596 | Y | 0.0653 | 1.0000 |
|  | 2019 | Delirium | 1.804140888 | Y | 0.0029 | 0.1198 |
|  | 2019 | Mental status changes | 2.24091545 | Y | 0.0003 | 0.0184 |
|  | 2020 | Delirium | 2.407171218 | Y | <.0001 | 0.0002 |
|  | ALL | Delirium | 1.565267628 | Y | <.0001 | <.0001 |
|  | ALL | Organic brain syndrome | 5.6675622 | Y | 0.0172 | 0.1695 |
| **Pembrolizumab** | 2016 | Mental status changes | 2.497268034 | Y | 0.0784 | 1.0000 |
|  | 2017 | Delirium | 2.344464432 | Y | 0.0116 | 0.3592 |
|  | 2018 | Delirium | 3.900863753 | Y | <.0001 | <.0001 |
|  | 2021 | Delirium | 2.439192845 | Y | 0.0002 | 0.0103 |
|  | 2021 | Poor quality sleep | 2.125405826 | Y | 0.0277 | 0.6666 |
|  | 2021 | Eating disorder | 2.131378018 | Y | 0.0271 | 0.6591 |
|  | 2022 | Eating disorder | 3.015593307 | Y | <.0001 | <.0001 |
|  | 2023 | Delirium | 1.609714177 | Y | 0.0284 | 0.6810 |
|  | 2024 | Listless | 3.357264057 | Y | 0.0368 | 0.8229 |
|  | 2025 | Delirium | 1.85708711 | Y | 0.0100 | 0.3211 |
|  | ALL | Delirium | 1.715175854 | Y | <.0001 | <.0001 |
|  | ALL | Eating disorder | 1.472040919 | Y | 0.0005 | 0.0077 |
|  | ALL | Organic brain syndrome | 8.55599279 | Y | 0.0014 | 0.0196 |
|  | ALL | Fear of eating | 4.06406347 | Y | 0.0395 | 0.3207 |
| **Tislelizumab** | 2024 | Listless | 33.28466884 | Y | <.0001 | 0.0004 |
|  | 2025 | Dysphoria | 48.92879806 | Y | <.0001 | <.0001 |
|  | 2025 | Poor quality sleep | 3.364180117 | Y | 0.0618 | 1.0000 |
|  | ALL | Poor quality sleep | 2.902236666 | Y | 0.0170 | 1.0000 |
|  | ALL | Dysphoria | 11.81788899 | Y | <.0001 | 0.0037 |
|  | ALL | Listless | 15.45813777 | Y | <.0001 | 0.0051 |
